# Supplementary material for: Near-infrared aggregation-induced emission characteristics of new o-carborane fluorophores with large stokes shifts and self-recovering mechanochromic luminescence
Source: Royal Society of Chemistry journal article supplement (doi:10.1039/d4nj01733a), 2024-01-01
Supplement: d4nj01733a1.pdf [file d4nj01733a1.pdf]

## *Supporting Information*

### Near-infrared Aggregation-Induced Emission Characteristics of New *o*-Carborane Fluorophores with Large Stokes Shifts and Self- recovering Mechanochromic Luminescence

Xueyan Wu, Na Li, Chenxi Zhang, Yan Lv, Jixi Guo\*

State Key Laboratory of Chemistry and Utilization of Carbon Based Energy  
Resources; College of Chemistry, Xinjiang University, Urumqi, 830017, Xinjiang, PR  
China

Email: [Wuxy90@xju.edu.cn](mailto:Wuxy90@xju.edu.cn), [jxguo1012@163.com](mailto:jxguo1012@163.com),

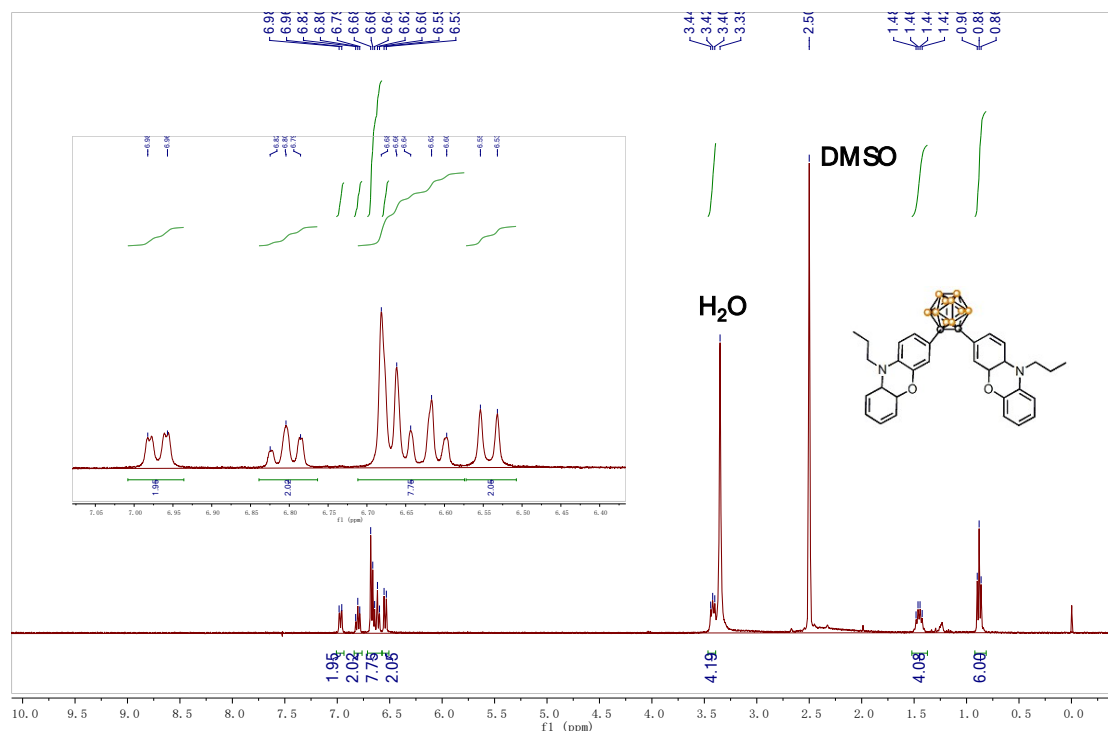

**Figure S1.  $^1\text{H}$  NMR spectra of CPO in  $\text{DMSO-}d_6$**

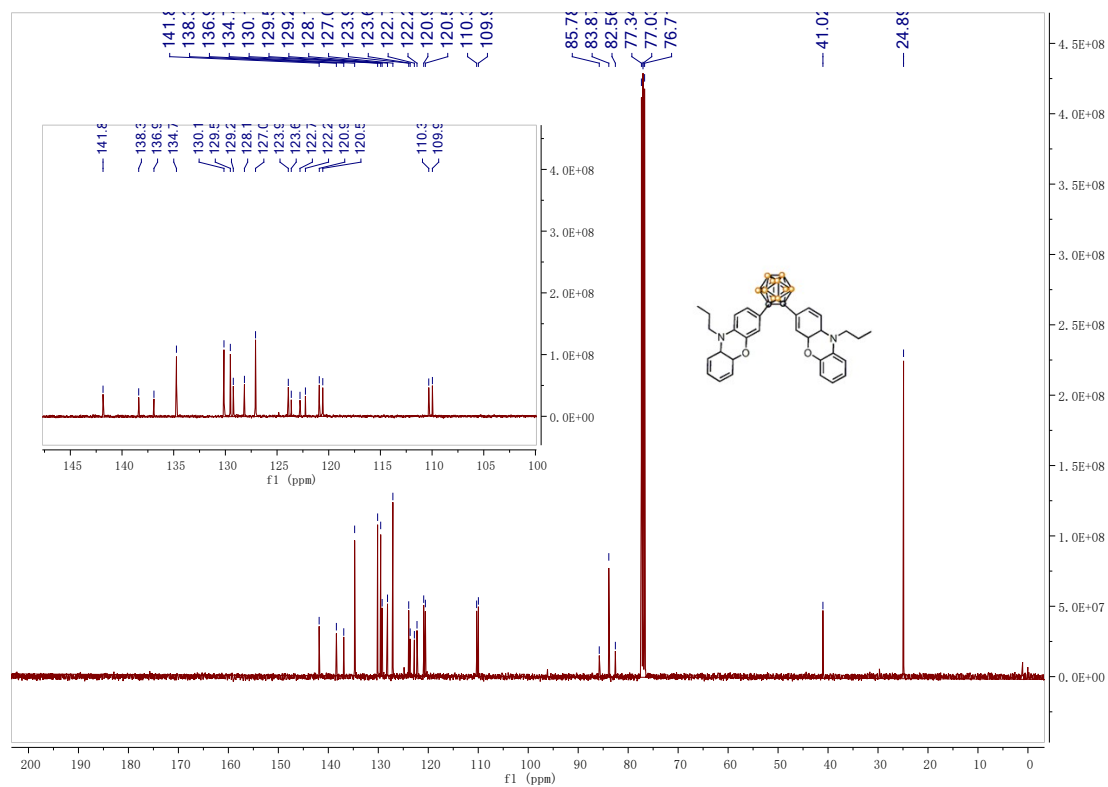

**Figure S2.  $^{13}\text{C}$  NMR spectra of CPO in  $\text{CDCl}_3$**

CBPNO-ESI(500-700)#1 RT: 0.00 AV: 1 NL: 8.76E6  
T: FTMS - p ESI Full ms [500.0000-700.0000]

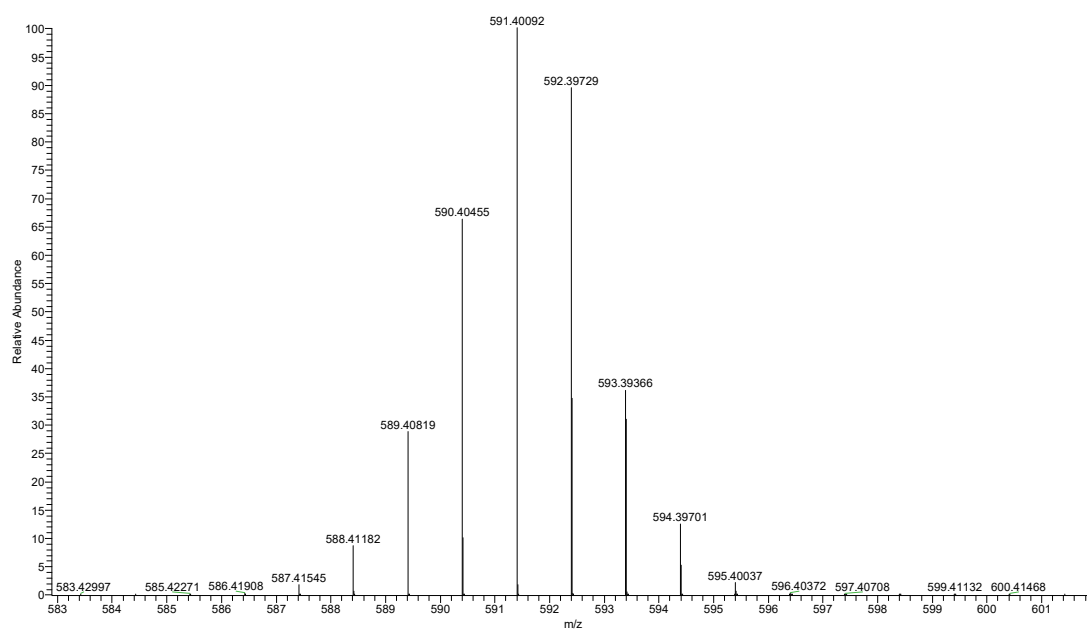

Figure S3. HRMS spectra of CPO

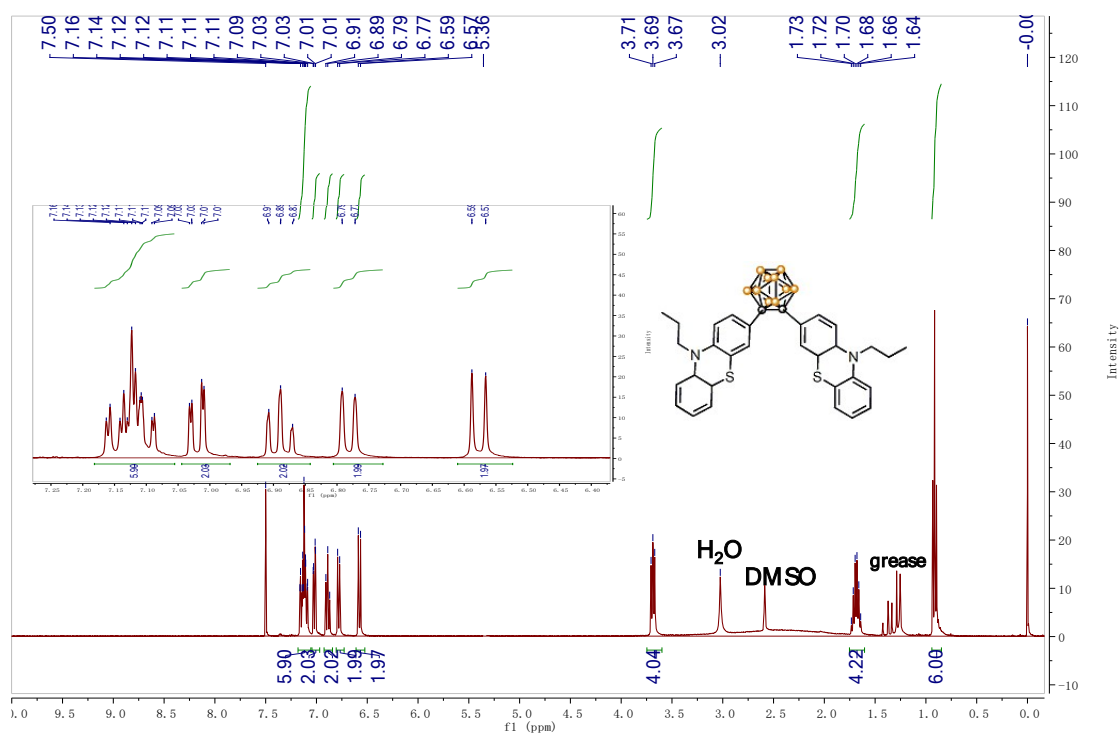

Figure S4. <sup>1</sup>H NMR spectra of CPS in CDCl<sub>3</sub> and DMSO-*d*<sub>6</sub>.

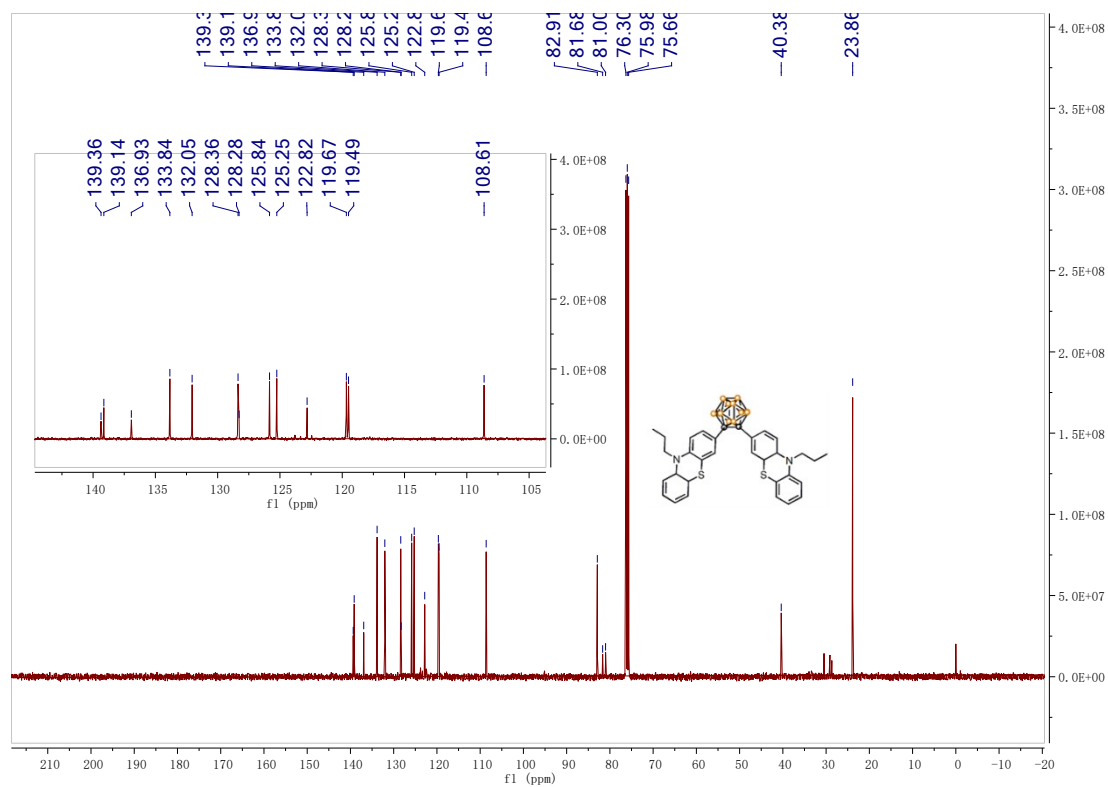

**Figure S5.**  $^{13}\text{C}$  NMR spectra of CPS in  $\text{CDCl}_3$ .

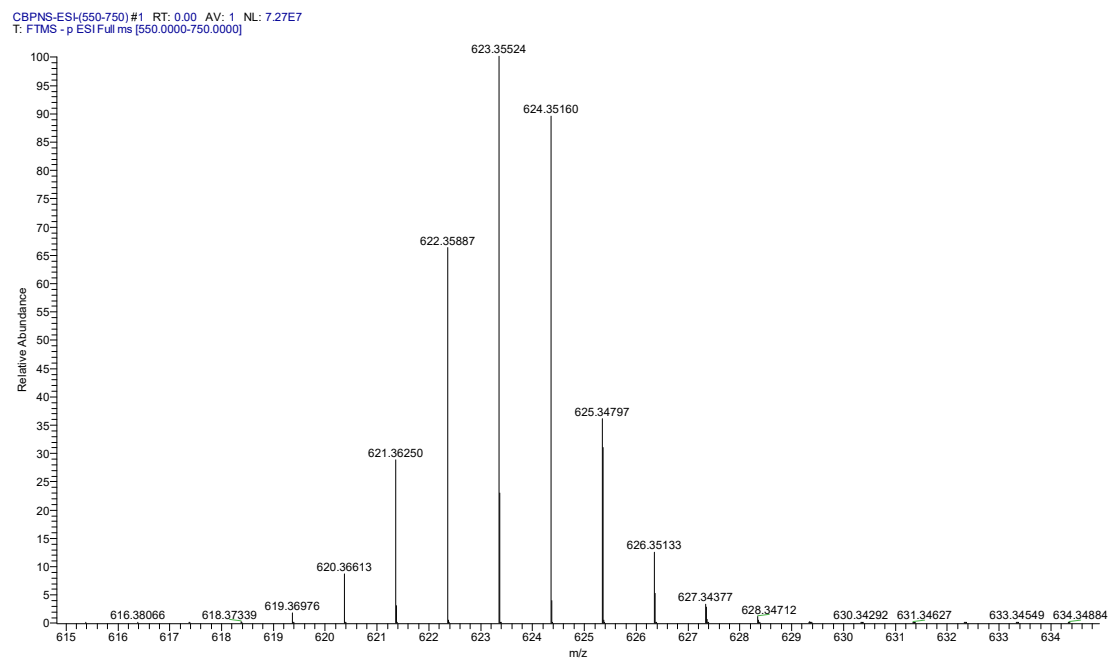

**Figure S6.** HRMS spectra of CPS

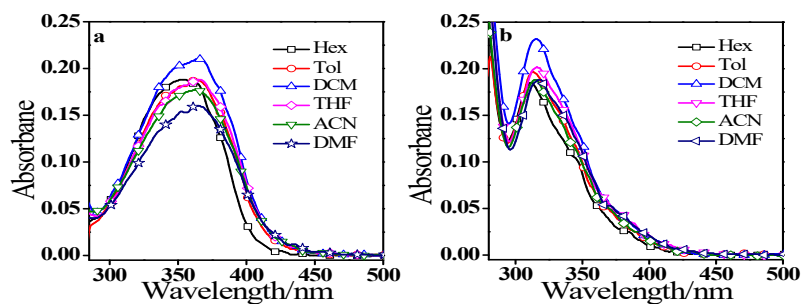

**Figure S7.** UV-Vis absorption spectra of (a) CPO and (b) CPS in different solvents.  $c = 1.0 \times 10^{-5}$  M, 20 °C.

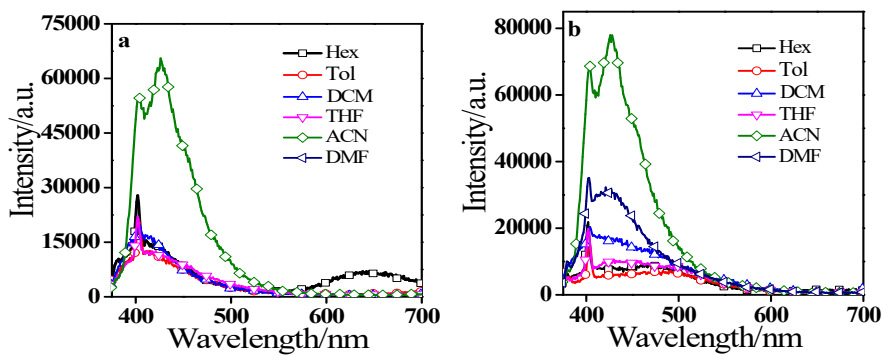

**Figure S8.** Fluorescence spectra of (a) CPO and (c) CPS in different solvents. ( $\lambda_{ex}=360$ nm),  $c = 1.0 \times 10^{-5}$  M, 20 °C.

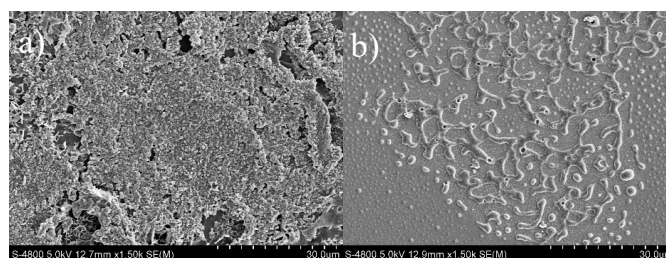

**Figure S9** SEM images of (a) CPO and (b) CPS with a 99% water fraction.

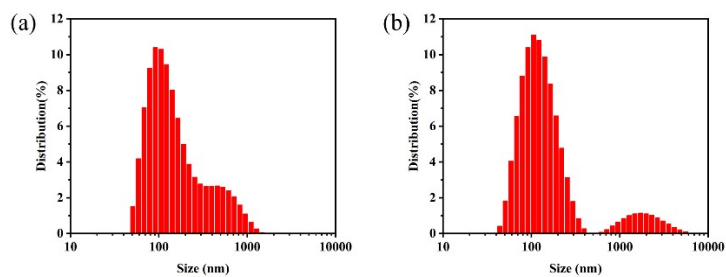

**Figure S10** Size distributions of nanoparticles of (a) CPO and (b) CPS with a 99% water fraction.

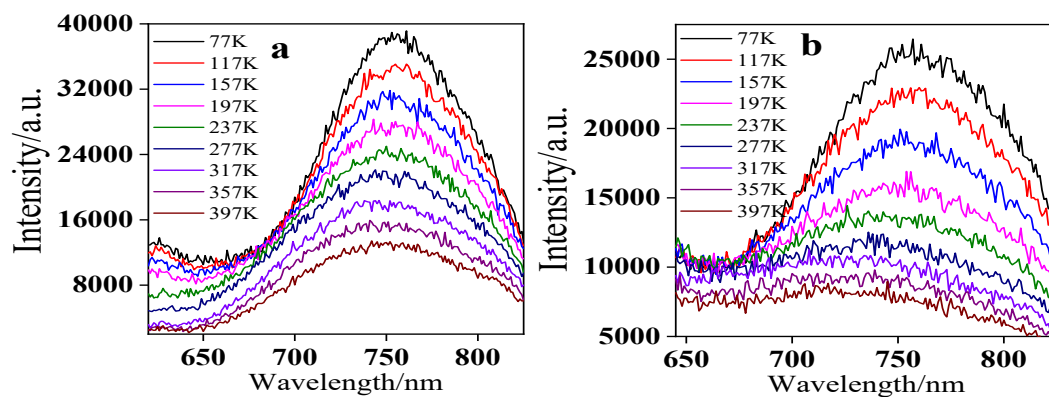

**Figure S11.** The normalized PL spectra of (a) CPO and (b) CPS in the solid state during heating from 77 to 397K.

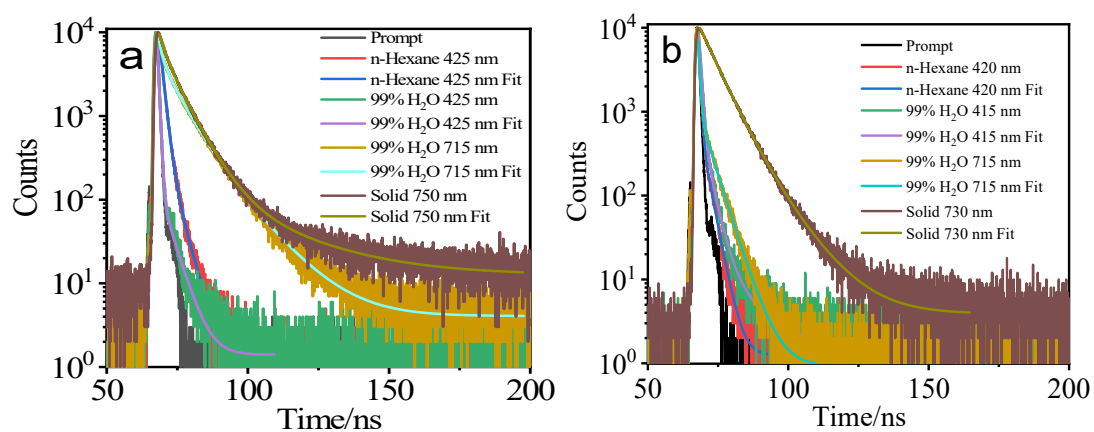

**Figure S12.** Decay profiles of fluorescence lifetime measurement of (a) CPO and (b) CPS in the solution, aggregation and solid state.

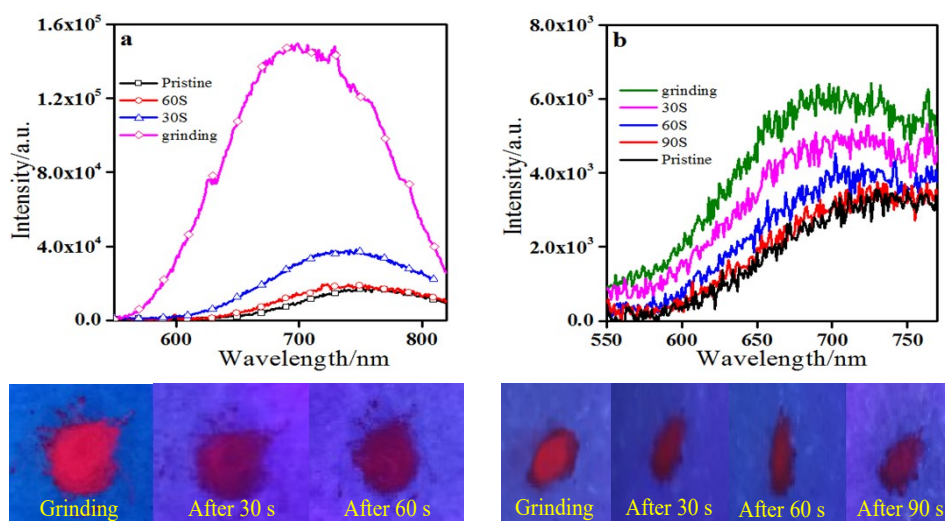

**Figure S13.** The self-recovering mechanochromic luminescence of (a) CPO and (b) CPS in solid at 60 °C, and the mechanochromic luminescence photographs of CPO and CPS changes with time under day and 365 nm UV light

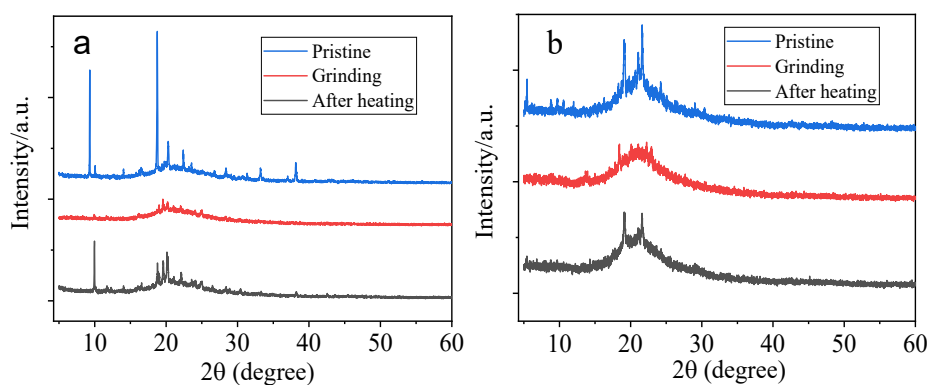

**Figure S14.** XRD patterns of CPO (a) CPS (b) in different solid-states: Pristine, Grinding and After heating.

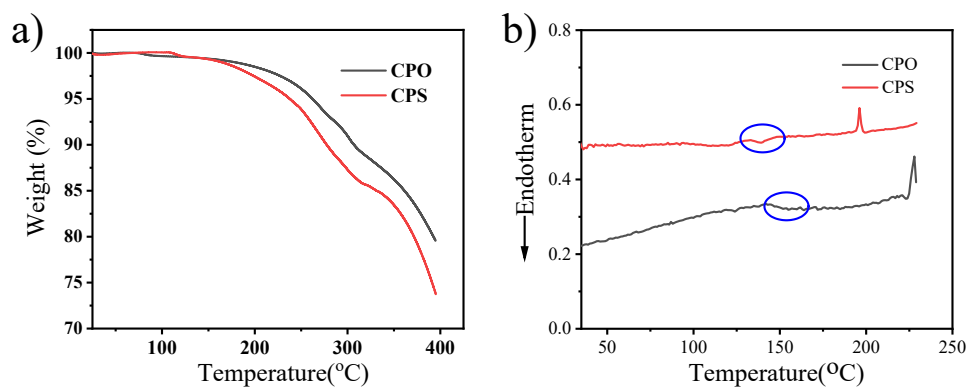

**Figure S15.** (a)TG and (b)DSC of CPO and CPS measured at a heating rate of 10 °C/min under N<sub>2</sub> atmosphere.

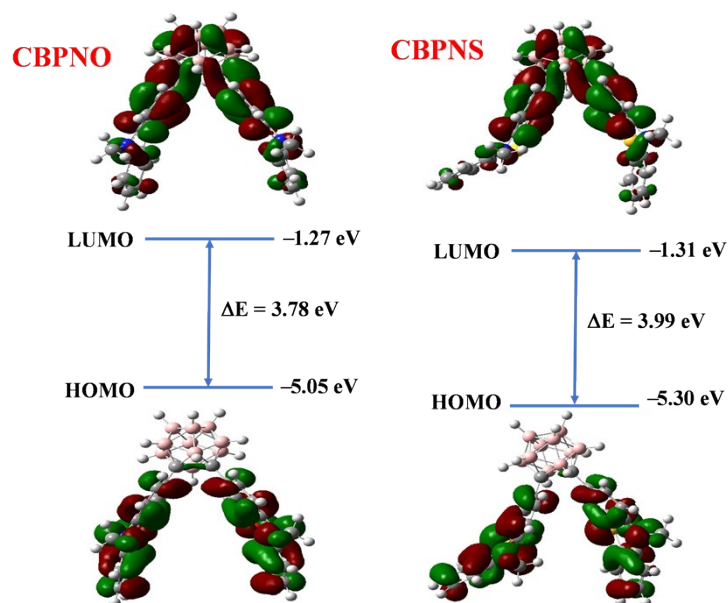

**Figure S16.** The electronic density contours and energy levels of the HOMOs and LUMOs of CPO and CPS were calculated by DFT at the B3LYP/6-31G(d,p) level with Gaussian 09W.

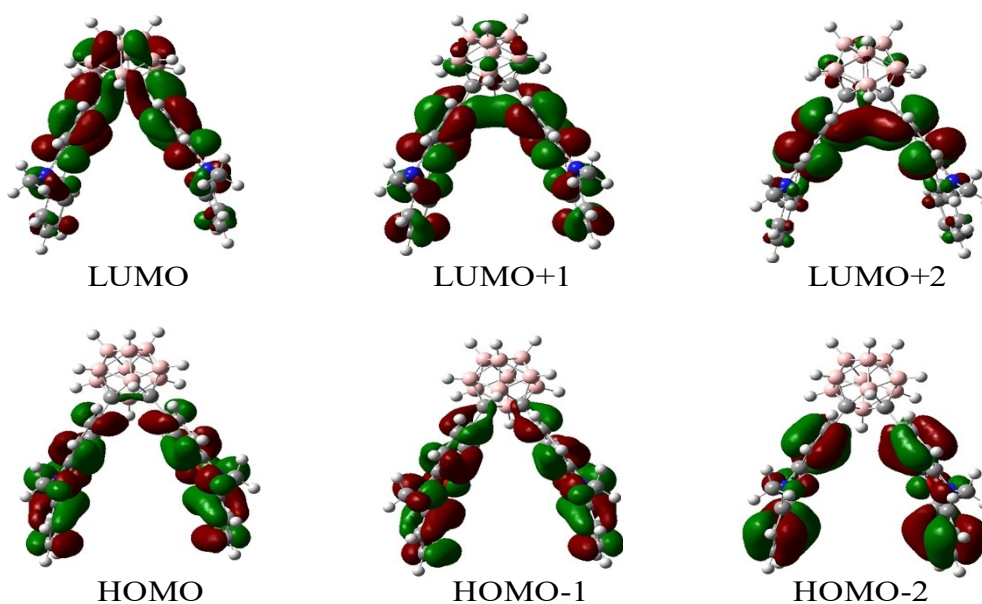

**Figure S17.** The theoretical calculated ground-state frontier orbitals contributions of CPO in gas phase using B3LYP/6-31G (d, p) level by Gaussian 09.



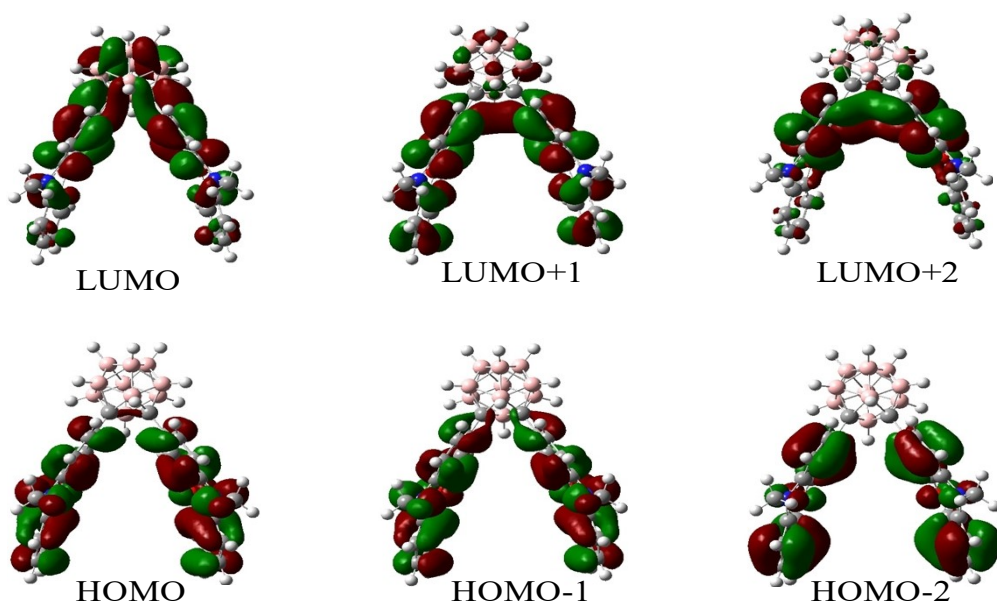

**Figure S18.** The theoretical calculated UV-vis absorption frontier orbitals contributions of CPO in gas state estimated by TD-DFT calculation at the B3LYP/6-31G (d, p) level by Gaussian 09.

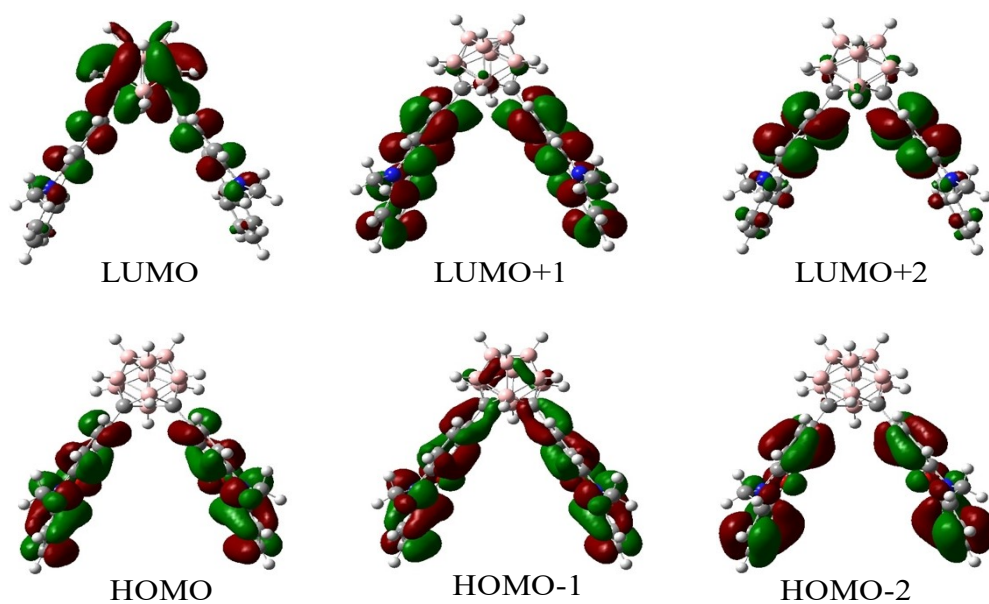

**Figure S19.** The theoretical calculated singlet state (Fluorescence) frontier orbitals contributions of CPO in gas state estimated by TD-DFT calculation at the B3LYP/6-31G (d, p) level by Gaussian 09.

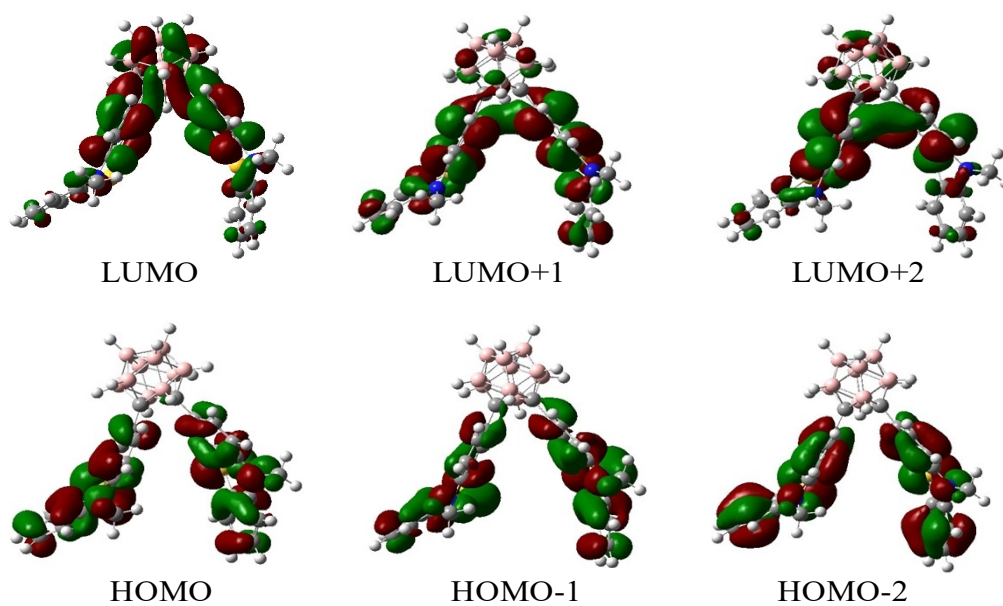

**Figure S20.** The theoretical calculated ground-state frontier orbitals contributions of CPS in gas sate using B3LYP/6-31G (d, p) level by Gaussian 09.

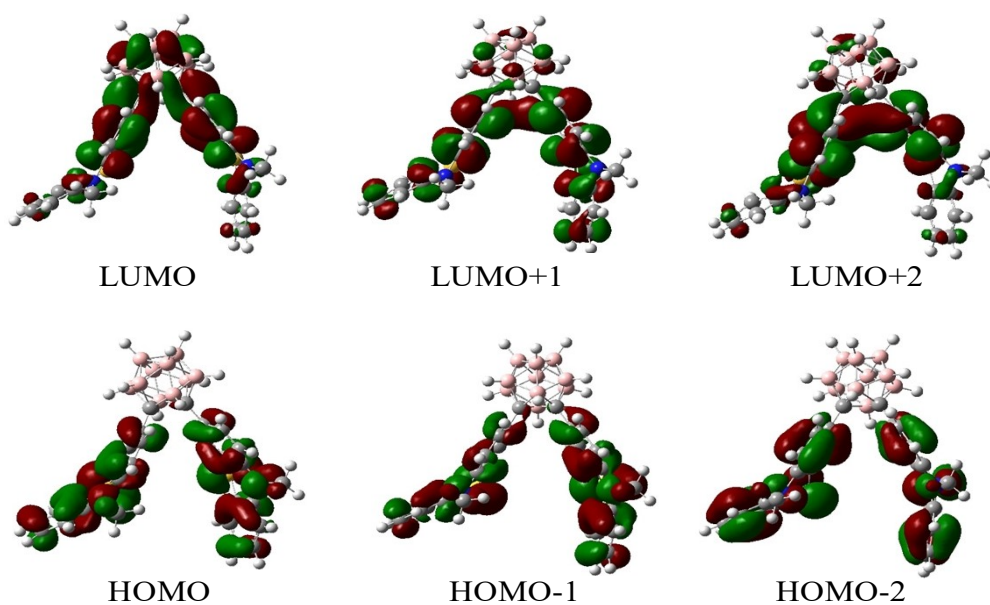

**Figure S21.** The theoretical calculated UV-Vis absorption frontier orbitals contributions of CPS in gas sate estimated by TD-DFT calculation at the B3LYP/6-31G (d, p) level by Gaussian 09.

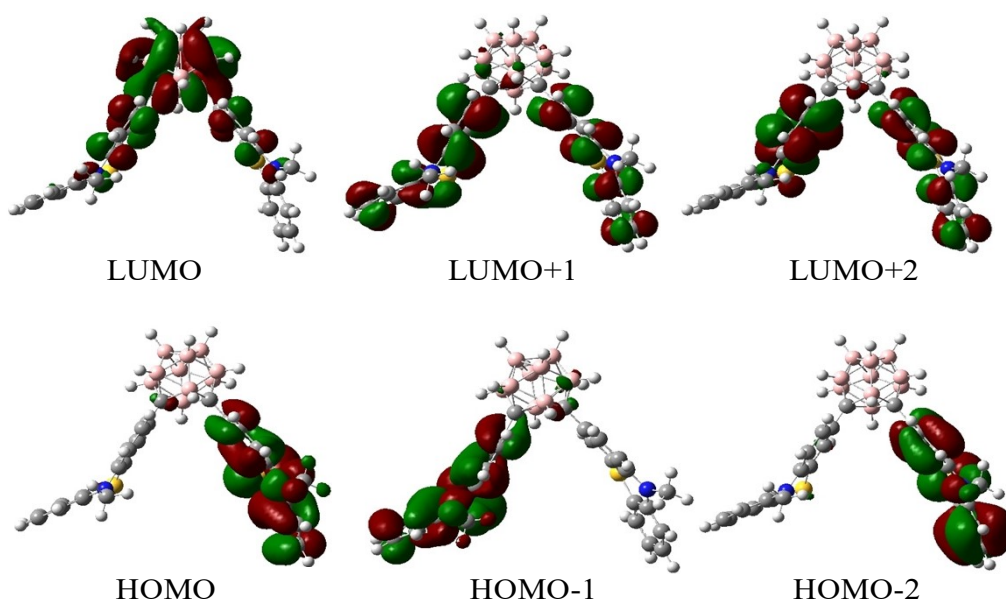

**Figure S22.** The theoretical calculated singlet state (Fluorescence) frontier orbitals contributions of CPS in gas state estimated by TD-DFT calculation at the B3LYP/6-31G (d, p) level by Gaussian 09.

**Table S1.** Selected parameters for the UV-vis absorption and Singlet state (Fluorescence) energy of the compounds. Electronic excitation energies (eV), oscillator strengths ( $f$ ), and configurations of the low-lying excited states of CPO and CPS were calculated using TD-DFT//B3LYP/6-31G(d, p), based on the optimized ground state geometries.

| Compound |              | Transition type                | Excitation energy <sup>a</sup> | $f^b$  | Composition <sup>c</sup> | CI <sup>d</sup> |
|----------|--------------|--------------------------------|--------------------------------|--------|--------------------------|-----------------|
| CPO      | UV-Vis       | S <sub>0</sub> →S <sub>1</sub> | 3.2751 eV (379 nm)             | 0.1088 | H→L                      | 0.6843          |
|          |              | S <sub>0</sub> →S <sub>2</sub> | 3.3535 eV (370 nm)             | 0.1483 | H-1→L                    | 0.6845          |
|          | Fluorescence | S <sub>0</sub> →S <sub>1</sub> | 1.7305 eV (716 nm)             | 0.2198 | H→L                      | 0.7063          |
| CPS      | UV-Vis       | S <sub>0</sub> →S <sub>1</sub> | 3.4373 eV (360 nm)             | 0.0799 | H→L                      | 0.6557          |
|          |              | S <sub>0</sub> →S <sub>2</sub> | 3.4856 eV (355 nm)             | 0.0728 | H-1→L                    | 0.6464          |
|          | Fluorescence | S <sub>0</sub> →S <sub>1</sub> | 1.4981 eV (827 nm)             | 0.1195 | H→L                      | 0.7055          |

<sup>a</sup> Only selected excited states were considered. Numbers in parentheses are the excitation energy in wavelength. <sup>b</sup> Oscillator strength. <sup>c</sup> H stands for the HOMO and L stands for the LUMO. Only the main configurations are presented. <sup>d</sup> Coefficient of the wave function for each excitation. CI coefficients are given in absolute values.
